# Supplementary material
Source: publisher figshare collection journal article supplement (https://tandf.figshare.com/ndownloader/files/12354896)
Supplement: Supplementary file 1 [file 12354896]

**Supplementary Materials** for “*Adoption of System of Rice Intensification under Information Constraints: An Analysis for India”*

Appendix A.1 : SRI Yield (in Quintals per Acre) per District

| **District** | **Mean** | **Std. Dev.** |
| --- | --- | --- |
| Chikmagalur | 27.82 | 12.74 |
| Hassan | 27.27 | 8.88 |
| Shahdol | 22.22 | 10.41 |
| Sidhi | 7.49 | 5.15 |
| Keonjhar | 23.16 | 19.20 |
| Mayurbhanj | 14.94 | 13.04 |

Source: Author’s Survey Data

Appendix A.2: SRI Yield (in Quintals per Acre) by Farm Size

| **Farm Size** | **Mean** | **Std. Dev.** |
| --- | --- | --- |
| Marginal | 18.66 | 17.39 |
| Small | 18.93 | 12.87 |
| Semi-Medium | 23.06 | 12.87 |
| Medium and Large | 20.98 | 9.77 |

Note: Marginal refers to land size upto 2.5 acres. Small refers to land size between 2.5 to 5 acres. Semi Medium is land between 5 acres to 10 acres. Medium and large refers to land size greater than 10 acres.

Source: Author’s Survey Data

Appendix A.3: Income (Rs. Lakhs) in each district

| **District** | **Mean** | **Std. Dev.** |
| --- | --- | --- |
| Chikmagalur | 1.23 | 1.38 |
| Hassan | 1.69 | 1.31 |
| Shahdol | 0.66 | 0.47 |
| Sidhi | 0.37 | 0.13 |
| Keonjhar | 0.48 | 0.38 |
| Mayurbhanj | 0.40 | 0.20 |

Source: Author’s Survey Data

Appendix A.4: Income (Rs. Lakhs) by Farm Size

| **Farm Size** | **Mean** | **Std. Dev.** |
| --- | --- | --- |
| Marginal | 0.40 | 0.24 |
| Small | 0.63 | 0.45 |
| Semi-Medium | 1.14 | 1.02 |
| Medium and Large | 2.74 | 2.46 |

Source: Author’s Survey Data

Note: Marginal refers to land size upto 2.5 acres. Small refers to land size between 2.5 to 5 acres. Semi Medium is land between 5 acres to 10 acres. Medium and large refers to land size greater than 10 acres.

Appendix A.6: Yield (in Quintals per acre) across SRI Practices

| **Depth of Adoption** | **Mean** | **Std. Dev.** |
| --- | --- | --- |
|  |  |  |
| Young Seedling | 5.83 | 3.54 |
| Shallow Planting | 9.46 | 5.97 |
| Single Seedling | 11.56 | 9.22 |
| Wider Spacing | 18.18 | 19.39 |
| Mechanical Weeding | 21.14 | 10.24 |
| Use of Organics | 25.04 | 16.50 |
| Water Mgmt. | 26.67 | 8.41 |

Source: Author’s Survey Data

Appendix A.7: Yield (in Quintals per acre) across quartiles of SRI intensity

| **SRI Intensity Quartiles** | **Mean** | **Std. Dev.** |
| --- | --- | --- |
|  |  |  |
| Bottom 25% | 22.68 | 21.37 |
| Between 25%- 50% | 16.60 | 10.60 |
| Between 50%- 75% | 18.55 | 10.10 |
| Top 25% | 19.00 | 11.37 |

Source: Author’s Survey Data
